# Supplementary material for: Differential Binding of Three Major Human ADAR Isoforms to Coding and Long Non-Coding Transcripts
Source: MDPI journal article supplement (doi:10.3390/genes8020068), 2017-02-11
Supplement: s1 [file s1]

# Supplementary Materials: Differential Binding of Three Major Human ADAR Isoforms to Coding and Long Non-Coding Transcripts

Josephine Galipon, Rintaro Ishii, Yutaka Suzuki, Masaru Tomita and Kumiko Ui-Tei

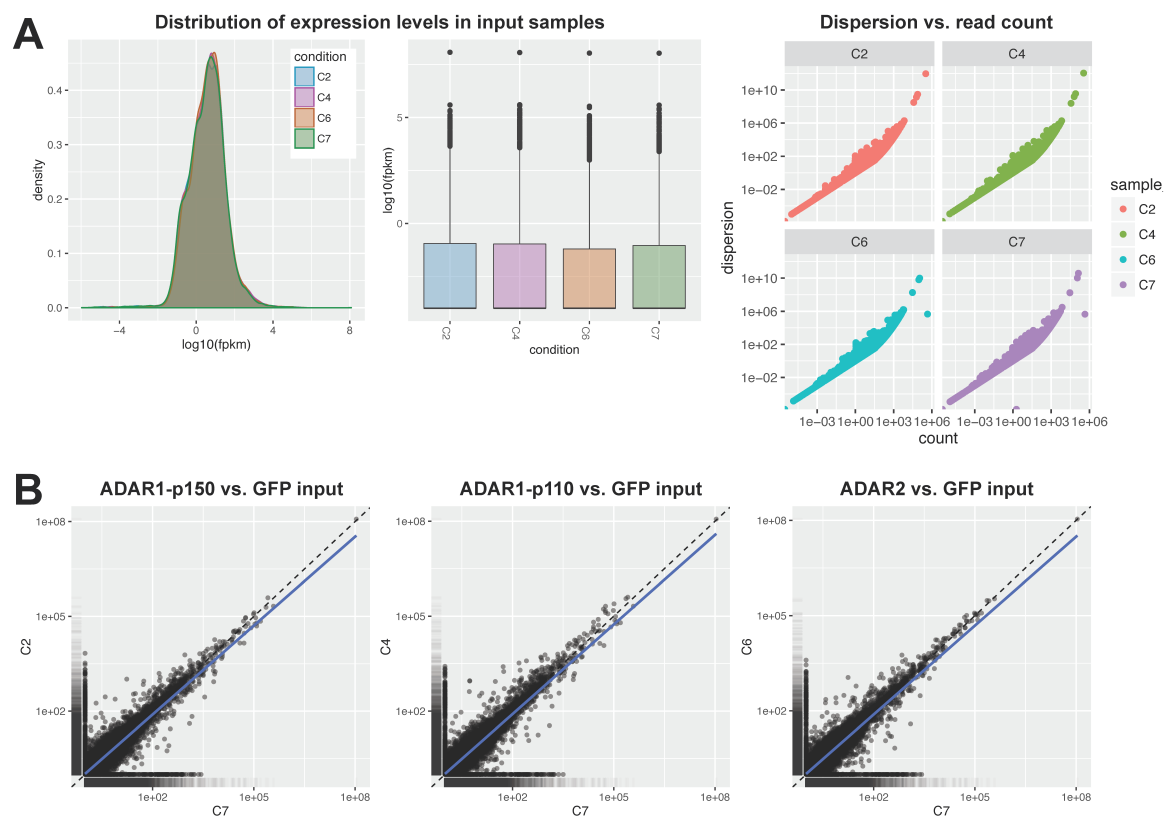

**Figure S1.** Statistics on the RNA-seq data sets for differential expression analysis. **(A)** Left: density distribution of the expression levels of transcripts in each sample on a log10 scale. Middle: box plot representing the distribution of expression levels in each sample. Right: scatter plot representing the dispersion as a function of read count for each sample; **(B)** Scatter plots of the expression levels in the input sample of each ADAR isoform relative to GFP input. C2, C4, C6, and C7 stand for ADAR1-p150, ADAR1-p110, ADAR2, and green fluorescent protein (GFP), respectively.
